# Supplementary material for: Co-Culture with Bifidobacterium catenulatum Improves the Growth, Gut Colonization, and Butyrate Production of Faecalibacterium prausnitzii: In Vitro and In Vivo Studies
Source: Microorganisms. 2020 May 25;8(5):788. doi: 10.3390/microorganisms8050788 (PMC7285360; doi:10.3390/microorganisms8050788)
Supplement: Supplementary file 1 [file microorganisms-08-00788-s001.pdf]

Supplementary Materials: Figure S1. Growth of *F. prausnitzii* ATCC 27768 with different *Bifidobacterium animalis* strains in liquid culture in the presence of various carbohydrates. Figure S2. Production of SCFA by bacteria in monoculture and co-culture. Concentrations of SCFA (acetate, lactate, formate, and butyrate) were determined 9 and 24 h after inoculation. Figure S3. Changes in the viable cell number and pH of cultures of *F. prausnitzii* and *B. animalis* subsp. *lactis* RD68 in YCFOS medium.

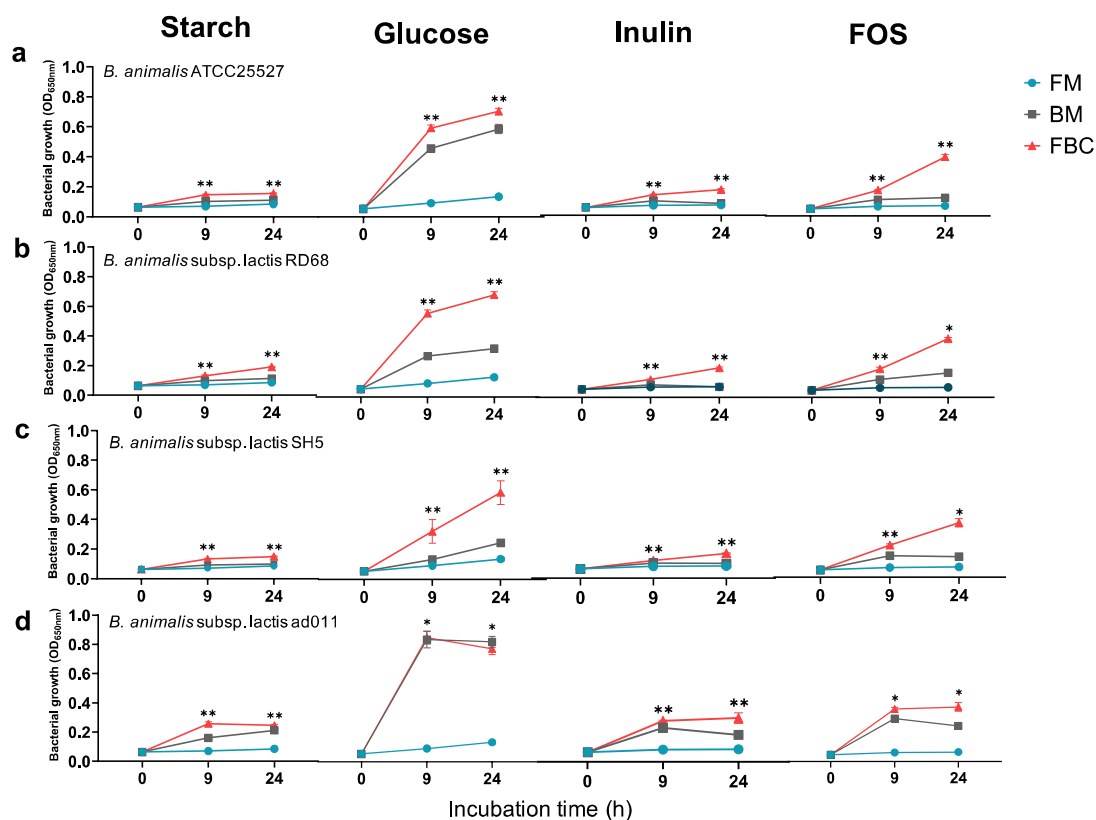

**Figure S1.** Growth of *F. prausnitzii* ATCC 27768 with different *Bifidobacterium animalis* strains in liquid culture in the presence of various carbohydrates. Culture OD<sub>650</sub> was determined at various time points after inoculation. *F. prausnitzii* growth in monoculture and co-culture with *B. animalis* ATCC 25527 (a), *B. animalis* subsp. *lactis* RD68 (b), *B. animalis* subsp. *lactis* SH5 (c), and *B. animalis* subsp. *lactis* ad011 (d) is shown. All growth experiments were performed in the YCFA medium without SCFA supplemented with starch, glucose, inulin, or FOS, for 24 h. The data are presented as the mean  $\pm$  standard deviation (n = 4). Statistically significant differences vs. FM group are denoted (\*p < 0.05, \*\*p < 0.01). FM, monoculture of *F. prausnitzii*; BM, monoculture of *Bifidobacterium*; FBC, co-culture of *F. prausnitzii* and *Bifidobacterium*.

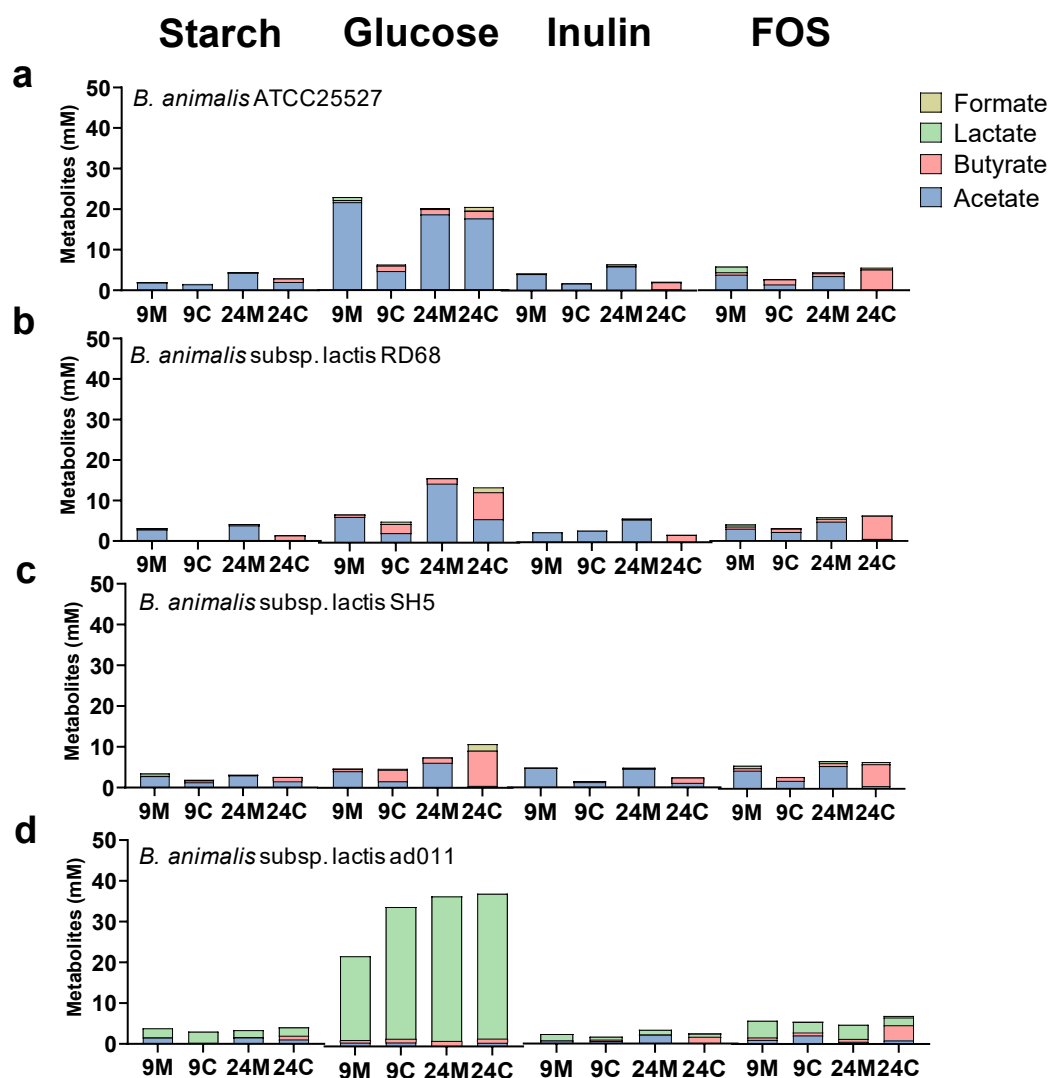

**Figure S2.** Production of SCFA by bacteria in monoculture and co-culture. Concentrations of SCFA (acetate, lactate, formate, and butyrate) were determined 9 and 24 h after inoculation. Data for *F. prausnitzii* in monoculture and in co-culture with *B. animalis* ATCC 25527 (a), *B. animalis* subsp. lactis RD68 (b), *B. animalis* subsp. lactis SH5 (c), and *B. animalis* subsp. lactis ad011 (d) are shown. All experiments were performed in YCFA medium without SCFA supplemented with starch, glucose, inulin, or FOS. The data are presented as the mean (n = 3). 9M, metabolites from *F. prausnitzii* and *Bifidobacterium* monocultures after 9 h; 9C, metabolites in *F. prausnitzii* and *Bifidobacterium* co-culture after 9 h; 24M, metabolites from *F. prausnitzii* and *Bifidobacterium* monocultures after 24 h; 24C, metabolites in *F. prausnitzii* and *Bifidobacterium* co-culture after 24 h.

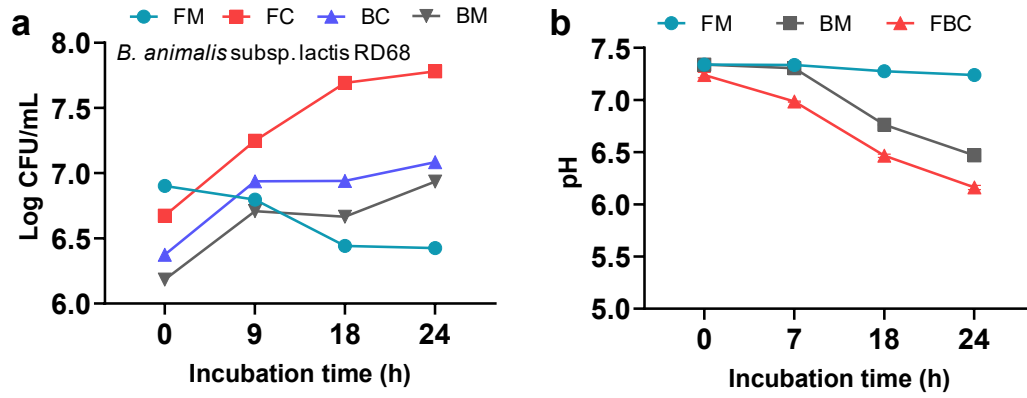

**Figure 3.** Changes in the viable cell number and pH of cultures of *F. prausnitzii* and *B. animalis* subsp. *lactis* RD68 in YCFOS medium. Data for *F. prausnitzii* in monoculture or co-culture with *B. animalis* subsp. *lactis* RD68 (**a,b**) in YC medium supplemented with FOS are shown. Samples were analyzed at the indicated time intervals. Cell numbers were determined by viable counts, as CFU/mL, after plating on LYBHI agar (**a**). The pH changes are plotted in (**b**). The data are presented as the mean  $\pm$  standard deviation ( $n = 3$ ). FM, *F. prausnitzii* in monoculture; BM, *Bifidobacterium* in monoculture; FC, *F. prausnitzii* in co-culture; BC, *Bifidobacterium* in co-culture; FBC, co-culture of *F. prausnitzii* and *Bifidobacterium*.
